# Supplementary material
Source: Springer Nature journal article supplement (https://www.springerprofessional.de/resource/supplementary/13638_2012_834_MOESM9_ESM.pdf/11898590)

64 Hadamard Codes with 10 users at Channel 1

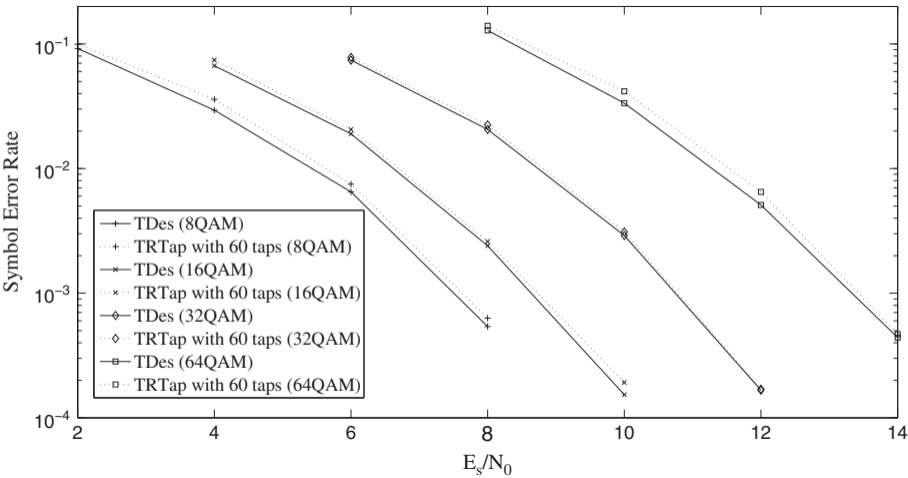

Supplement: MOESM9 [file 11898590]
